# Supplementary material
Source: bioRxiv or medRxiv preprint supplement (https://medrxiv.org/content/medrxiv/early/2021/03/04/2020.12.15.20248130/DC1/embed/media-1.pdf)
Supplement: Supplementary file [file media-1.pdf]

# Determinants of SARS-CoV-2 transmission to guide vaccination strategy in an urban area

Sarah C. Brüningk<sup>1,2,\*</sup>, Juliane Klatt<sup>1,2,\*</sup>, Madlen Stange<sup>2,3,5,\*</sup>, Alfredo Mari<sup>2,3,5</sup>, Myrta Brunner<sup>3,4</sup>,  
Tim-Christoph Roloff<sup>2,3,5</sup>, Helena M.B. Seth-Smith<sup>2,3,5</sup>, Michael Schweitzer<sup>3,5</sup>, Karoline Leuzinger<sup>6,15</sup>,  
Kirstine K. Sogaard<sup>3,5</sup>, Diana Albertos Torres<sup>3,5</sup>, Alexander Gensch<sup>3</sup>, Ann-Kathrin Schlotterbeck<sup>3</sup>,  
Christian H. Nickel<sup>7</sup>, Nicole Ritz<sup>9</sup>, Ulrich Heininger<sup>9</sup>, Julia Bielicki<sup>9</sup>, Katharina Rentsch<sup>10</sup>, Si-  
mon Fuchs<sup>12</sup>, Roland Bingisser<sup>7</sup>, Martin Siegemund<sup>11</sup>, Hans Pargger<sup>11</sup>, Diana Ciardo<sup>13</sup>, Olivier  
Dubuis<sup>13</sup>, Andreas Buser<sup>14</sup>, Sarah Tschudin-Sutter<sup>8</sup>, Manuel Battegay<sup>8</sup>, Rita Schneider-Sliwa<sup>4</sup>,  
Karsten M. Borgwardt<sup>1,2,+</sup>, Hans H. Hirsch<sup>6,8,15,+</sup>, Adrian Egli<sup>3,5,+,†</sup>

<sup>1</sup>*Machine Learning & Computational Biology, Department of Biosystems Science and Engineering, ETH Zurich, Basel, Switzerland*

<sup>2</sup>*Swiss Institute for Bioinformatics (SIB), Lausanne, Switzerland*

<sup>3</sup>*Applied Microbiology Research, Department of Biomedicine, University of Basel, Basel, Switzerland*

<sup>4</sup>*Human Geography, Department of Environmental Sciences, University of Basel, Basel, Switzerland*

<sup>5</sup>*Clinical Bacteriology and Mycology, University Hospital Basel & University of Basel, Basel, Switzerland*

<sup>6</sup>*Clinical Virology, University Hospital Basel & University of Basel, Basel, Switzerland*

<sup>7</sup>*Emergency Department, University Hospital Basel, Basel, Switzerland*

<sup>8</sup>*Infectious Diseases and Hospital Epidemiology, University Hospital Basel & University of Basel,*

22 *Basel, Switzerland*

23 <sup>9</sup>*Paediatric Infectious Diseases and Vaccinology, University of Basel Children's Hospital Basel*  
24 *and University of Basel, Basel, Switzerland*

25 <sup>10</sup>*Laboratory Medicine, University Hospital Basel, Basel, Switzerland*

26 <sup>11</sup>*Intensive Care Medicine, University Hospital Basel, Basel, Switzerland*

27 <sup>12</sup>*Health Services for the Basel-City, Basel, Switzerland*

28 <sup>13</sup>*Viollier AG, Allschwil, Switzerland*

29 <sup>14</sup>*Regional Blood Transfusion Service, Swiss Red Cross, Basel, Switzerland*

30 <sup>15</sup>*Transplantation & Clinical Virology, Department Biomedicine, University of Basel, Basel,*  
31 *Switzerland*

32 *\*These authors contributed equally to this work*

33 *+These authors share senior authorship*

34 *†corresponding author*

35 **Supplementary Material**

36 **Supplementary Methods**

37 **PCR testing and whole-genome sequencing.** PCR testing was available rapidly and frequent  
38 testing was established and supported by local guidelines by the end of February 2020, before  
39 the first case arrived<sup>1</sup>. SARS-CoV-2 testing was made available (i) via a walk-in test center in

40 the city center affiliated to the University Hospital Basel, which allowed screening of legal-aged  
41 patients with mild and severe symptoms, (ii) via the University Children's Hospital for minors  
42 on recommendation by the pediatricians, and (iii) via the obligatory screening of any incoming  
43 patients to the University Hospital Basel irrespective of symptoms. Testing in case of symptoms  
44 was covered by the Swiss mandatory health insurance scheme preventing sampling bias from  
45 affluent socioeconomic population groups. In total 7073 PCR tests from Basel-City residents  
46 were performed at the University Hospital Basel (UHB) (750 of which were SARS-CoV-2 positive)  
47 dating between 25<sup>th</sup> of February and 22<sup>nd</sup> of April, 2020. The total number of positive cases  
48 for Basel-City including also external testing sources for the same time range was 928, hence  
49 the cases registered at the UHB cover 80.8% of the total case burden<sup>2</sup>. The ratio of negative to  
50 positive PCR tests changed during the local epidemic with a median of 10.6% positive PCR tests  
51 (Figure 2B). We successfully sequenced SARS-CoV-2 whole genomes from 411 unique patients  
52 (54.8% of our cases, 44% of all cases). Of these, 247 (247/411, 60%) could be attributed to contain  
53 the C15324T mutation in the B.1 lineage (and therefore called B.1-C15324T) characteristic to the  
54 virus variant that originated in this tri-national area<sup>3</sup>.

55 **Geographic mapping and socioeconomic stratification.** Basel-City is divided into 21 urban  
56 quarters and had a population of 201,971 in 2020<sup>4</sup> (Figure S9). For subsequent analyses, a total  
57 of 1,078 statistical (housing) blocks (a city block partitioned by e.g. streets, rivers) were iden-  
58 tified within the city quarters. Each individual PCR test (N = 7073), irrespective of the result,  
59 was linked to the patient's place of residence anonymized at the scale of statistical blocks in

60 ArcMap 10.7 (by ESRI). To explore the statistical association between SARS-CoV-2 transmission  
61 and socioeconomic factors, we employed data provided by the Canton of Basel-City's office for  
62 statistics for the year of 2017 (most recent data available), that specified the values for various  
63 socioeconomic indicators for each statistical block (except for those blocks where privacy leg-  
64 islation did not permit the sharing of such information). The indicators under study were (i)  
65 the living space (per capita in  $m^2$ ), (ii) the share of 1-person private households, (iii) the me-  
66 dian income (CHF), and (iv) the population seniority (percentage of senior citizens aged over  
67 64 years per block). According to these socioeconomic indicators, blocks were allocated to one  
68 of three socioeconomic city tertiles (T1:  $\leq$ 33rd percentile , T2: 33rd to 66th percentile T3:  $>$ 66th  
69 percentile) where possible (e.g. Figure 3A). In general, sparsely populated blocks displayed a  
70 maximum of three positive cases and had to be excluded from analysis. All following analyses  
71 with respect to socioeconomic factors were based on these city partitions.

72 **Phylogenetic inference and cluster analysis.** Whole-SARS-CoV-2-genomes from Basel-City  
73 patients were assembled using our custom analysis pipeline COVGAP<sup>3</sup> ([github.com/appliedmicrobiologyresearch](https://github.com/appliedmicrobiologyresearch/COVGAP)  
74 [COVGAP](https://github.com/appliedmicrobiologyresearch/COVGAP)). Global sequences and metadata were downloaded from GISAID<sup>5,6</sup> (as of October  
75 22,2020; 155,278 consensus sequences). Sequences with more than 10 percent N's (27,013)  
76 and with incomplete dates (43,466) were removed. 84,799 sequences remained which were  
77 joined with Basel genomes. Filtering for the period of interest until April 22<sup>nd</sup> retained 39,913  
78 genomes, of which 411 are from Basel-City residents dating from February 26<sup>th</sup> (first case) to  
79 April 22<sup>nd</sup>, 2020.

80 To infer relatedness among the viral genomes and spread of SARS-CoV-2 in Basel-City, a time-  
81 calibrated phylogeny that was rooted to the first cases in Wuhan, China from December 2019,  
82 was inferred using a subset of the global genomes. For subsetting, we included 30 genomes  
83 per country and month, whereby all genomes from Basel-City were retained, totalling 3,495  
84 genomes, using the nextstrain software v.2.0.0 ([nextstrain.org](https://nextstrain.org)) and augur v.8.0.0<sup>7</sup> as described  
85 in detail in <sup>3</sup>.

86 The resulting global phylogeny was used to infer phylogenetic clusters in Basel-City. First, poly-  
87 tomies, which are caused by identical genomes in the tree were resolved using ETE3 v.3.1.1<sup>8</sup>.  
88 Cluster Picker v.1.2.3<sup>9</sup> was then used to identify clusters in the resolved tree (options 0, 0, 4e-  
89 4, 5). Identified clusters were consolidated with epidemiological data (occupation in a health  
90 service job, resident of a care home, contact to positive cases, onset of symptoms, place of infec-  
91 tion) to confirm the suitability of the divergence parameter. Cluster Matcher v.1.2.4<sup>9</sup> was then  
92 used to combine ancillary geographic (quarter), and socioeconomic or demographic informa-  
93 tion that were subdivided into tertiles on identified clusters.

94 To test whether related genomes in Basel-City cluster according to a) quarter, b) living space per  
95 person, c) share of 1-person households, d) median income, or e) seniority a custom python-  
96 script for a random permutation test was performed<sup>10</sup> ([github.com/appliedmicrobiologyresearch/Influenza-](https://github.com/appliedmicrobiologyresearch/Influenza-2016-2017)  
97 [2016-2017](https://github.com/appliedmicrobiologyresearch/Influenza-2016-2017)). The results for clustering within and among urban quarter and tertiles in socioeco-  
98 nomic determinants were visualized using circos v.0.69<sup>11</sup>.

99 **Serology.** SARS-CoV-2 antibody responses were determined in a total of 2,019 serum samples  
100 collected from individuals between 25<sup>th</sup> of February and 22<sup>nd</sup> of May, 2020, to account for se-  
101 roconversion. Serology information was used to estimate the fraction of unreported cases as  
102 follows: An estimated 1.88% (38/2,019) of the Basel-City population was infected with SARS-  
103 CoV-2. Of these 60% would be attributed to the B.1-C15324T variant, leading to a percentage of  
104 88% of unreported/unsequenced cases to consider.

105 **Mobility data.** We employed the official traffic model provided by the traffic department of  
106 Basel-City <sup>12</sup>. The latter consists of the 2016 average A-to-B traffic on a grid of ~1400 count-  
107 ing zones for four transport modalities: foot, bike, public motorized transport and private mo-  
108 torized transport. We further obtained weekly averages of pass-by traffic for the same count  
109 zones over the period of the first wave of the pandemic for the categories of combined foot and  
110 bike traffic, as well as private motorized traffic. Additionally, weekly public-transport passen-  
111 ger loads were provided by both the Swiss Federal Rail Company and the local public transport  
112 services. From these datasets, we computed the spatio-temporal variation of mobility within  
113 the city as follows. Spatial variation was obtained by aggregating A-to-B traffic between the  
114 aforementioned counting zones, first to the statistical block level (by identifying the nearest  
115 housing block with respect to a zone's centroid), and second to tertile level via a statistical-  
116 block's association with a socioeconomic indicator tertile. This resulted in a there-by-three mo-  
117 bility matrix  $M_{jk}$  whose diagonal entries represent within-tertile mobility, while off-diagonal  
118 entries represent inter-tertile mobility. This matrix was normalized to one since only relative

119 differences were relevant in our model. We hence obtained a direct link between mobility and  
120 socioeconomic/demographic information agglomerated based on the unifying scale of statis-  
121 tical blocks. Temporal variation was obtained by computing the weighted sum of the private  
122 transport time-series provided by the traffic department and the public transport time-series  
123 provided the Swiss Federal Rail Company and the local public transport services. This sum was  
124 then normalized and smoothed with a uni-variate spline resulting the final time-series for tem-  
125 poral mobility variation employed in our model (denoted as  $\alpha_{mob}(t)$ ), see Figure 3D).

126 **Dynamic changes in social interaction.** SARS-CoV-2 transmission is contact-based. While  
127 the number of contacts potentially taking place within a day and a city is largely influenced  
128 by human mobility as estimated above, the risk of a contact becoming a transmission event is  
129 further determined by the precautions taken by the two individuals being in contact (such as  
130 washing hands, wearing masks, distance keeping). Both aspects together—mobility and risk-  
131 mitigating social behaviour within a (sub-)population—eventually result in an effective, time-  
132 dependent, reproductive number characterizing the virus’s transmission within that (sub-)population.  
133 Hence, there are three relevant time-series: changes in the overall effective reproductive num-  
134 ber, in mobility, and in social behaviour. While the computation of the temporal variations in  
135 mobility was described above, the time-dependent effective reproductive number is obtained  
136 by applying a Kalman filter<sup>13,14</sup> to the piece-wise linearised time-series of daily confirmed cases  
137 of individuals having contracted the B.1-C15324T variant of SARS-CoV-2. Assuming a mul-  
138 tiplicative model, the time-dependence of residual transmission risk stemming from lack of

139 precaution in social interaction (denoted as  $\alpha_{soc}(t)$ ), is obtained by point-wise division of the  
140 time-dependence of the effective reproductive number by the mobility time-series (depicted  
141 in Figure 3D). Thus we are adhering to the logic that in the extreme case of zero mobility, no  
142 transmission can take place despite a finite risk of transmission rooted in a lack of precautions,  
143 while on the other hand in the case of zero risk of transmission due to perfect precautions, no  
144 transmission can take place despite non-zero mobility. Such logic dictates the choice of a mul-  
145 tiplicative rather than additive model.

146 **Fitting procedure and evaluation of the SEIR-model.** In total 247 cases within the time pe-  
147 riod from the 25th of February until the 22nd of April were included in this analysis. For all data  
148 a seven day moving window average was taken to account for reporting bias on weekends, and  
149 cumulative numbers of infected cases (compartment  $I$ ) were calculated. Due to the loss of sin-  
150 gle sequencing plate, missing numbers on the 29th, 30th and 31st of March were imputed by  
151 assuming a constant ratio of the B.1-C15324T variant amongst the sequenced samples. Simula-  
152 tions were initialized on the 22nd of February, the estimated date of the occurrence of the initial  
153 exposed cases<sup>3</sup>.

154 The ODE system was implemented in python (version 3.8.) using the scipy functions *odeint* to  
155 iteratively solve the system of equations and *minimize* (with L-BFGS algorithm, cut-off toler-  
156 ance of  $10^{-7}$ ) for parameter fitting based on the average sum of squared differences between  
157 the logarithm of estimated and recorded cases. Points with cumulative case numbers below 15  
158 were not scored in the cost-function since the continuum assumption of the model may not



159 be satisfied for small case numbers. The fit was performed simultaneously for all four socioe-  
160 conomic partitions to account for the shared parameters  $T_{infU}$  (obtained 1.8 days) and  $T_{infP}$   
161 (obtained 2.1 days). Fit performance was evaluated based on root mean squared error (RMSE)  
162 between predicted and recorded case numbers. Data uncertainty and the corresponding influ-  
163 ence on parameter estimation were assessed by bootstrapping. For each of 50 bootstraps each  
164 data point was randomly shifted according to numbers drawn from a normal distribution cen-  
165 tered around zero and standard deviation 0.3. Results are shown as mean values over bootstraps  
166 and bootstrap uncertainty bands.

167 **Scenario simulation.** The impact of mobility relative to social interaction was analysed by  
168 recalculating the predicted epidemic trajectory under the constraint of constant intra-urban  
169 mobility ( $\alpha_{mob}(t) = 1$ , scenario M1) or fully restricted ( $\alpha_{mob}(t) = 0$ , scenario M2) mobility, cor-  
170 responding to perfect isolation of the affected city areas. These scenarios were compared to the  
171 baseline of the actual reduction in mobility (scenario M0).

172 Vaccination scenarios were simulated as for both 90% and 70% effective vaccines to prevent  
173 COVID-19 resembling current vaccine candidate data <sup>15,16</sup>, as well as a range of vaccine effica-  
174 cies to prevent SARS-CoV-2 transmission (60%, 90%). This was achieved by moving the fraction  
175 of the vaccinated and not transmitting population from the susceptible to the recovered com-  
176 partment  $U_r$  and calculating the spread of the pandemic with constant effective reproductive  
177 number and intra-city mobility. We accounted for a change in social interaction behaviour  
178 following vaccination by assigning a mean social interaction score of the vaccinated and not-

179 vaccinated population amongst the initial susceptibles ( $\alpha_{soc,vacc}(t) = 0.75$ ,  $\alpha_{soc,novacc}(t) = 0.5$ ).  
180 Mobility was modelled as 100% ( $\alpha_{mob}(t) = 1$ ). Two scenarios were investigated and compared  
181 to the no vaccine scenario (V0): i) vaccination of a fixed population fraction (one or two thirds)  
182 randomly throughout the population (scenario V1), ii) vaccination of the corresponding num-  
183 ber of individuals from different socioeconomic groups (scenario V2 (exclusively from T1 me-  
184 dian income), V3 (exclusively from T3 seniority), V4 (50% from T1 median income, 50% from  
185 T3 seniority)). In order gauge the benefit of a particular vaccination scenario, we calculated  
186 the time to reach 50% of intensive care unit (ICU) capacity. The University Hospital Basel has  
187 a total of 44 ICU beds. During the first wave, 4.5% of reported SARS-CoV-2 positive cases were  
188 admitted to ICU, and their median length of ICU stay was 5.9 days (IQR, 1.5-12.9). If consid-  
189 ering additional unreported cases (captured by serological testing), the percentage of patients  
190 requiring ICU admission was 1%. Of all SARS-CoV-2 patients with ICU stay, 40% were younger  
191 than 64 years resulting in a probability of an under 64 year old infected case to be admitted to  
192 ICU of 0.5%. In case of vaccinated populations not at random, we adjust the relevant fraction  
193 of ICU cases based on the represented proportions of  $geq$  and  $<$  population fractions within all  
194 susceptibles.

195 \* Relevance of Basel-City in a European context - an overview. Basel-City has to be seen in its  
196 larger context: Basel-City is the core city of the trinational Greater Basel area and functional  
197 urban area (FUA), according to the official European statistics system. Basel-City is also part of  
198 a European cross-border region in the European Employment Services Network (EURES) that  
199 promotes labor mobility across state borders and it is a main center in the context of “European

200 Regions". "European regions" are "designer regions" or spaces of cooperation within well defined  
201 action perimeters. The role of such forms of regional governance is to foster cross-border coop-  
202 eration, regional competitiveness with collaborative development plans in interlinked, inter-  
203 locking metropolitan regions, which may be organized as "Eurodistricts" and are a mean in  
204 the EU-strategy to re-scale and decentralize development through regional institution build-  
205 ing. Planning at the Eurodistrict level is regulated by state treaties and can act with a relatively  
206 high degree of autonomy from their national governments, mostly in the areas of spatial plan-  
207 ning, traffic development and other aspects where links in development are missing.

208 Moreover, Basel and the Greater Basel area are also part of the Upper Rhine Region Metropolitan  
209 Economy, which by regional gross domestic product (GDP) is the eighth largest metropolitan  
210 economy in the EU. In summary, the case study of Basel-City is representative or transferable  
211 to other similar urban contexts because in the European harmonised statistical classifications  
212 (Eurostat and OECD classifications) as a metropolitan area, a functional urban area, and a part  
213 of a European cross-border region, it is representative for other urban areas classified similarly.  
214 This makes information obtained from analyses of Basel-City comparable and transferable to  
215 other such urban areas. This is explained in more detail below.

216 *Basel Metropolitan area:* The Greater Basel area is a metropolitan area according the OECD/Eurostat  
217 definition, stretching into three countries with a population of around 830,000 in the Trinational  
218 Eurodistrict of Basel, an organization of municipalities and cities in the trinational surround-  
219 ings of Basel and central cooperation body in the agglomeration of Basel<sup>17,18</sup>. Metropolitan re-  
220 gions are NUTS 3 Eurostat statistical subdivisions according to the nomenclature des unités ter-

221 ritoriales statistiques - a classification of territorial units for statistical analyses. The NUTS clas-  
222 sification provides for a harmonised hierarchy of regions and Eurostat lists 541 such metropoli-  
223 tan areas <sup>19</sup>.

224 Metropolitan areas are engines for growth and employment, the centers of competitiveness,  
225 and innovation, and contribute strongly to economic growth, social and political functions  
226 and are important for local, regional and international transport. Although only Basel-City,  
227 or rather, a small number of city quarters were examined here, Basel-City is a “hub”, i.e. the  
228 core of a larger metropolitan region with a commuter catchment area and on a scale that corre-  
229 sponds to the definitions of OECD and Eurostat (European Statistical Office) which also apply  
230 to Switzerland. As such, it is the contextualization of the city/urban quarter study within the  
231 larger urban/metropolitan/functional urban area, that make the study area comparable with  
232 other such metropolitan regions. Using Basel-City as a case study of an urban core or “core city”  
233 of its larger urban area / metropolitan area/ functional urban area makes the city, the study area  
234 and the results comparable or transferable to other urban areas/metropolitan areas/ functional  
235 urban areas and their core cities.

236

237 *Basel as a hub of a Functional Urban Area:* The Greater Basel area is also a functional  
238 urban area (FUA) in the official European statistics system. Functional urban areas consist of  
239 a densely inhabited city and a less densely populated commuting zone whose labor market is  
240 highly integrated with the city. FUAs extend beyond formal administrative boundaries. The  
241 OECD, in cooperation with the EU, has developed a harmonised definition of functional urban

242 areas (FUAs). Being composed of a city (or core) and its commuting zone, FUAs encompass  
243 the economic and functional extent of cities based on daily people's movements<sup>20</sup>. The defini-  
244 tion of FUA aims at providing a functional/economic definition of cities and their area of influ-  
245 ence, by maximising international comparability and overcoming the limitation of using purely  
246 administrative approaches. At the same time, the concept of FUA, unlike other approaches,  
247 ensures a minimum link to the government level of the city or metropolitan area. The new har-  
248 monized OECD definition of cities, urban areas, functional urban areas and commuting zones  
249 allows for the first time a comparison within the European urban hierarchy. It identified 828  
250 (greater) cities with an urban center of at least 50 000 inhabitants in the EU, and the "greater  
251 city level" greatly improved international comparability<sup>20</sup>.

252

253 *Basel-City as part of a European EURES-labor market and labor mobility region:* Basel-City  
254 is also part of a European cross-border region within the European commission's Strategy of  
255 Employment, Social Affairs and Inclusion European Employment Services-EURES cooperation  
256 network that promotes labor mobility in the EU and its partner countries in terms of assistance  
257 for recruitment and job placements, and providing information to cross order workers and em-  
258 ployers on issues such as social security, insurance and taxation<sup>21</sup>. EURES is based on technical  
259 standards and formats required for a uniform system to enable matching of job vacancies with  
260 job applications (Commission Implementing Decision (EU) 2017/1257 of 11 July 2017). EU in-  
261 ternal border regions cover 40% of EU territory and are home to almost 2 million cross-border  
262 commuters. In 2018, more than 1.5 million people in the EU lived in one country and worked

263 in another. In the trinational Basel urban area 60,000 persons commute on a daily basis across  
264 state borders, of which around 34,000 commute daily into Basel-City<sup>22</sup>. Just as mobility is an  
265 important factor in the economy, it may be a driving factor in the transmission of disease which  
266 is why the Basel study may be relevant for other cross-border regions in Europe.

267

268 *Basel-City as part of a European cross-border region:* The trinational Basel metropolitan  
269 area with Basel-City as its center has been the first to organize itself in private initiative as a “Eu-  
270 ropean cross-border region” in 1960 (Regio Basiliensis e.V.) for the purpose of advancing com-  
271 mon interests and developments, enhancing cooperation between regions along state borders  
272 and between border regions throughout Europe. It has also served as a model for the institu-  
273 tionalised EU cross-border policy by means of INTERREG funding programs that aimed at pro-  
274 moting decentralized regional development through new forms of governance. Cross-border  
275 regions have flourished since the 1990 in particular because of their increasingly relevant role  
276 as implementation units for European regional policy in a context of multi-level governance  
277 <sup>23</sup>. Today, there are some larger 100 cross-border regions as outlined in figure S1. Within the  
278 nested hierarchy of European “designer regions” for the purpose of fostering regional develop-  
279 ment some contain the aforementioned Eurodistricts, which are a rather new model of regional  
280 governance for promoting economic development in several contiguous metropolitan areas.

281

282 *Perimeter of Unified Action of European regional governance:* The Greater Basel area is

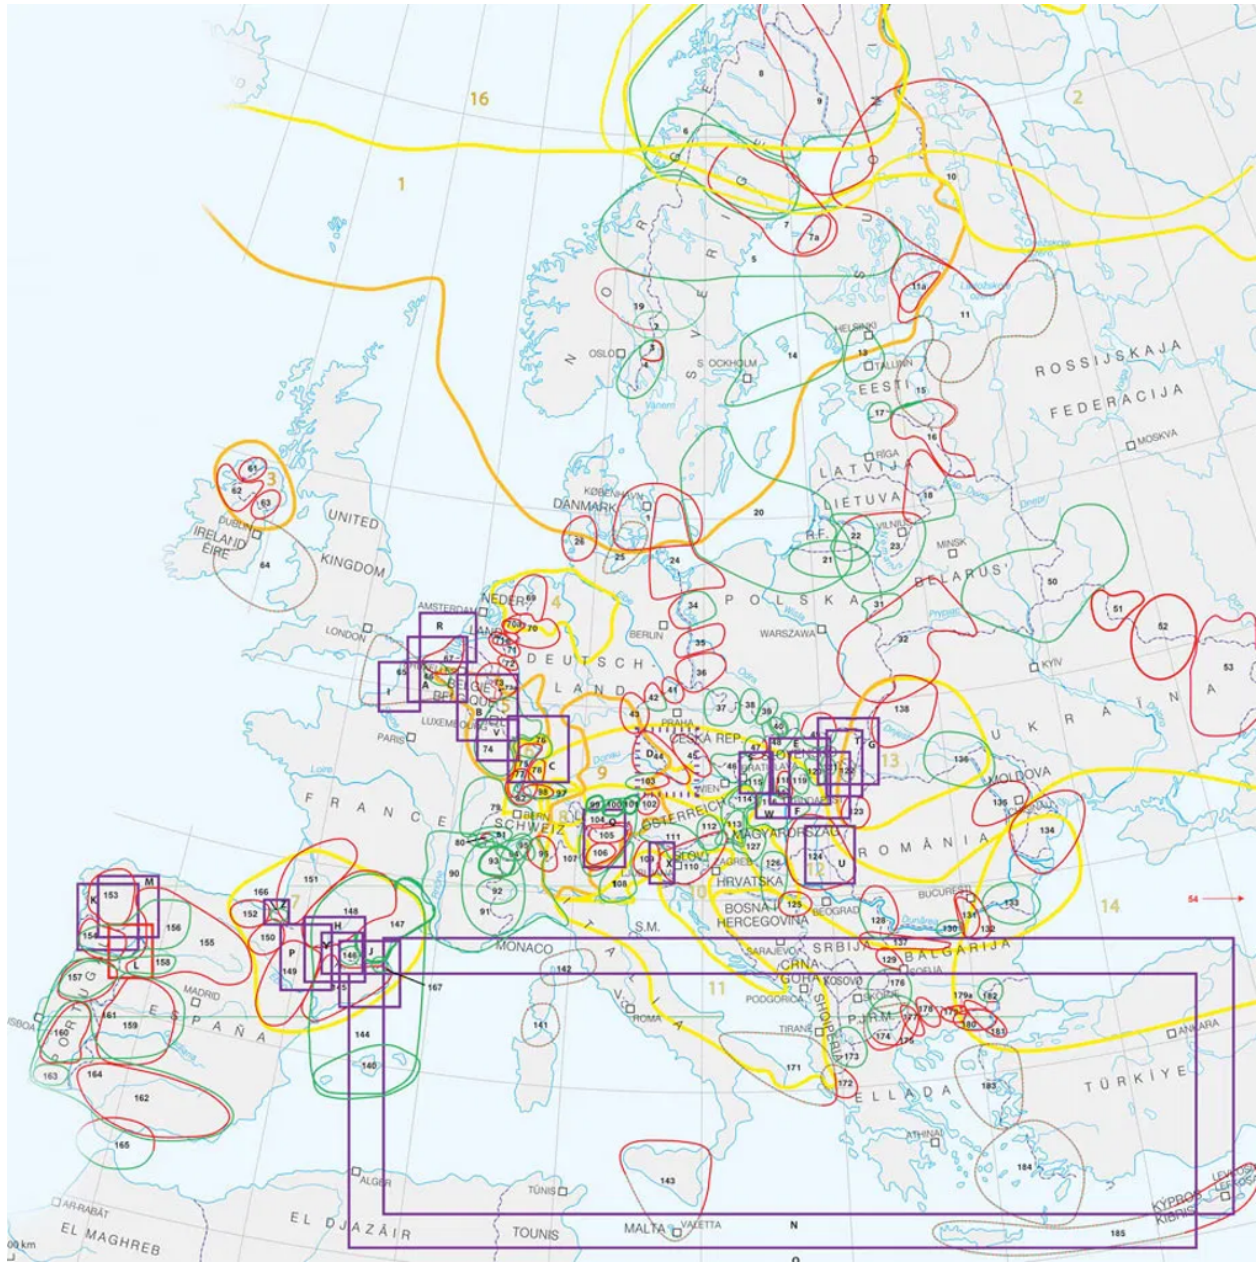

Figure S1: Association of European Border Regions (AEBR) and cross-border cooperation in Europe as shown in <sup>24</sup>.

283 furthermore part of the “Trinational Metropolitan Upper Rhine region” (TMUR). This refers to  
284 an innovative governance model for the four sub-areas Alsace, France, Northwest Switzerland,  
285 Southern Palatinate and Baden, Germany which together form an internationally strong busi-  
286 ness and knowledge location. The TMUR region refers to a perimeter of unified planning policy  
287 measures within a closely interlinked cross-border territory on issues of common interest. As  
288 a rather new form of territorial governance the TMUR region acts as umbrella over the existing  
289 metropolitan regions and trinational cooperations in the Upper Rhine and aims to strengthen  
290 their competitiveness within Europe and the world, and its public positions with respect to the  
291 political centers of Berlin, Paris, Bern, and Brussels. Collaborative efforts are focused on the  
292 areas of science, the economy, politics and civil society. By regional GDP and population size  
293 the TMUR can be seen as a major European metropolitan economy.

294 Metropolitan areas and metropolitan economies are engines and centers of growth and em-  
295 ployment, and their many universities and knowledge institutions are drivers of innovation  
296 and international competitiveness. Large urban agglomerations typically combine economic,  
297 social and political functions and form important hubs for regional and international connec-  
298 tion. Conceptually and methodically it is difficult to view this only in terms of administrative  
299 boundaries. The view on large metropolitan areas and regional governance models which en-  
300 compass multitudes of cities and towns is applied for international comparisons, and in today's  
301 global world the formation of larger metropolitan area governance forms which joins together  
302 urbanized areas even across administrative or state borders is the mechanism to achieve joint  
303 economic growth. The trinational metropolitan region Upper Rhine, in turn, is a major urban



304 economy within Europe, ranking eighth in terms of regional GDP behind metropolitan areas  
305 outlined in Table S1.

Table S1: Selection of European metropolitan areas with GDP, population and GRP. Data obtained from <sup>25-28</sup>

|                                | GRP [bio. euros] | Population [mio.] | GRP per inhabitant |
|--------------------------------|------------------|-------------------|--------------------|
| Greater London area            | 946              | 19.53             | 48.443             |
| Paris (Ile de France)          | 709              | 12.15             | 58.358             |
| Rhine-Ruhr area                | 403              | 9.63              | 41.850             |
| Randstadt Netherlands          | 397              | 8.15              | 48.659             |
| Milan (Lombardy)               | 381              | 10.02             | 38.023             |
| Brussels-Antwerp               | 264              | 5.67              | 46.656             |
| Barcelona (Catalonia)          | 224              | 7.44              | 30.101             |
| <b>Trinational Upper</b>       |                  |                   |                    |
| <b>Rhine Metropolitan area</b> | <b>209</b>       | <b>5.9</b>        | <b>34.889</b>      |
| Frankfurt (Darmstadt)          | 200              | 3.95              | 50.666             |
| Copenhagen-Malmö               | 180              | 3.29              | 54.827             |
| Munich                         | 177              | 6.12              | 79.690             |
| Berlin                         | 169              | 3.65              | 40.104             |

306 \* Reasoning for the study design Patterns of SARS-CoV-2 transmission have previously been  
307 discussed from different angles either via network and transmission modelling<sup>29</sup>, by statisti-  
308 cal evaluation<sup>30</sup>, or by phylogenetic clustering based on genomic sequencing data<sup>31</sup>. Whereas  
309 modelling approaches can account for and simulate rich detail such as socioeconomic and de-  
310 mographic information, it is essential to balance the trade-off between detail described and the  
311 number of data points available. Moreover, a more diverse socioeconomic and demographic  
312 population structure may make it easier to detect general trends. In order to address these  
313 needs, many modelling studies rely on publicly available case numbers without being able to  
314 relate the cases to specific socioeconomic parameters and specific geographic locations, or  
315 have to perform analysis predominantly for large metropolis. For such scenarios, it is inher-  
316 ently difficult to distinguish the spread of competing viral variants within the same population  
317 and to account for new introductions in a model - classical ODE or agent-based models are rely-  
318 ing on the assumption of uninterrupted transmission chains, information that whole-genome  
319 sequencing can provide. Yet given the cost of such analyses, whole genome sequencing cov-  
320 ering entire epidemic waves is often infeasible. In this study we address the aforementioned  
321 limitations and choose a trade-off between the population detail studies in-light of limited case  
322 numbers for which we hold detailed information, including whole genome sequencing: we per-  
323 form an analysis for a medium-sized, European city to account for the under-representation of  
324 these urban areas in previous modelling approaches. The case data used in this analysis was  
325 available for 80% of all reported cases in Basel-City and includes detailed, highly sensitive in-  
326 formation on the infected individuals to enable tracing of transmission chains which are not

327 publicly available. Sequencing was attempted for all samples and based on this data we re-  
328 stricted our analysis to inherently related cases of the B.1-C15324T variant. Although reducing  
329 the number of cases to <300, this implies that ODE based models are well suited to describe  
330 the dynamic development of these cases. We deliberately choose a continuum approach to  
331 incorporate socioeconomic, demographic and mobility information into this compartmental  
332 model since more complex network approaches would be infeasible for the final number of  
333 cases. This model enables us to evaluate general trends of transmission, such as effective re-  
334 productive numbers, and to use this information for vaccine scenario building.

335 In order to complement this more general analysis, we employ phylogenetic analysis to directly  
336 trace transmission clusters in detail. Phylogenetic analysis of positive cases provides rich infor-  
337 mation on relatedness of cases and hence supports modelling approaches by discerning intro-  
338 duction events and community spread. In this study we combine phylogenetic clustering with  
339 mathematical modelling of the SARS-CoV-2 transmission pattern. Our analysis is unique in the  
340 way that it is based on a large number of sequenced and phylogenetically related cases (411  
341 sequenced out 750 positives, 247 that belong to a single genomic variant). As such, we however  
342 hold rich information for a comparably small, yet densely sampled cohort of cases, and are able  
343 to provide a complete picture of SARS-CoV-2 transmission in a medium-sized city by choosing  
344 two complementary analysis tools.

345 \* References

346

**A**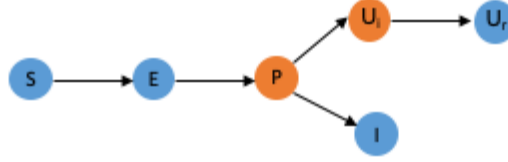**B**

$$\frac{dS_j}{dt} = -R_j \alpha_{soc}(t) \alpha_{mob}(t) \frac{S_j}{N_j} \cdot \left[ \sum_{k=1}^3 M_{j,k} \cdot \left( \frac{P_k}{T_{infP}} + \frac{U_k}{T_{infU}} \right) \right] \quad (1)$$

$$\frac{dE_j}{dt} = R_j \alpha_{soc}(t) \alpha_{mob}(t) \frac{S_j}{N_j} \cdot \left[ \sum_{k=1}^3 M_{j,k} \cdot \left( \frac{P_k}{T_{infP}} + \frac{U_k}{T_{infU}} \right) \right] - \frac{E_j}{T_{inc}} \quad (2)$$

$$\frac{dP_j}{dt} = \frac{E_j}{T_{inc}} - \frac{P_j}{T_{infP}} \quad (3)$$

$$\frac{dI_j}{dt} = (1 - p_{sq}) \frac{P_j}{T_{infP}} \quad (4)$$

$$\frac{dU_{i_j}}{dt} = p_{sq} \frac{P_j}{T_{infP}} - \frac{I_j}{T_{infU}} \quad (5)$$

$$\frac{dU_{r_j}}{dt} = \frac{I_j}{T_{infU}} \quad (6)$$

Figure S2: Overview of the SEIR model. A: Conceptual overview. We accounted for susceptibles ( $S$ ), exposed ( $E$ , incubation time  $T_{inc}$ ), and pre-symptomatic yet infectious cases ( $P$ ). After a presymptomatic time  $T_{infP}$ , cases were separated according to the estimated proportion of reported and sequenced cases,  $p_{sq}$ , into either reported infectious ( $I$ ), or unreported infectious ( $U_i$ , reproductive number  $R$ ). Since our data did not include information on recovered patients, a 'recovered' compartment was not included following  $I$ . It was assumed that reported cases remained isolated. The unreported compartment transitions to recovery ( $U_r$ ) after an infectious time  $T_{infU}$ . B: Relevant model equations to incorporate connectivity and exchange between the defined tertiles (index  $j$ ). Cross contamination was included through the mobility matrix  $M_{jk}$  and relevant temporal variation of mobility and social interaction (weighting factors  $\alpha_{mob}(t)$  and  $\alpha_{soc}(t)$ ).

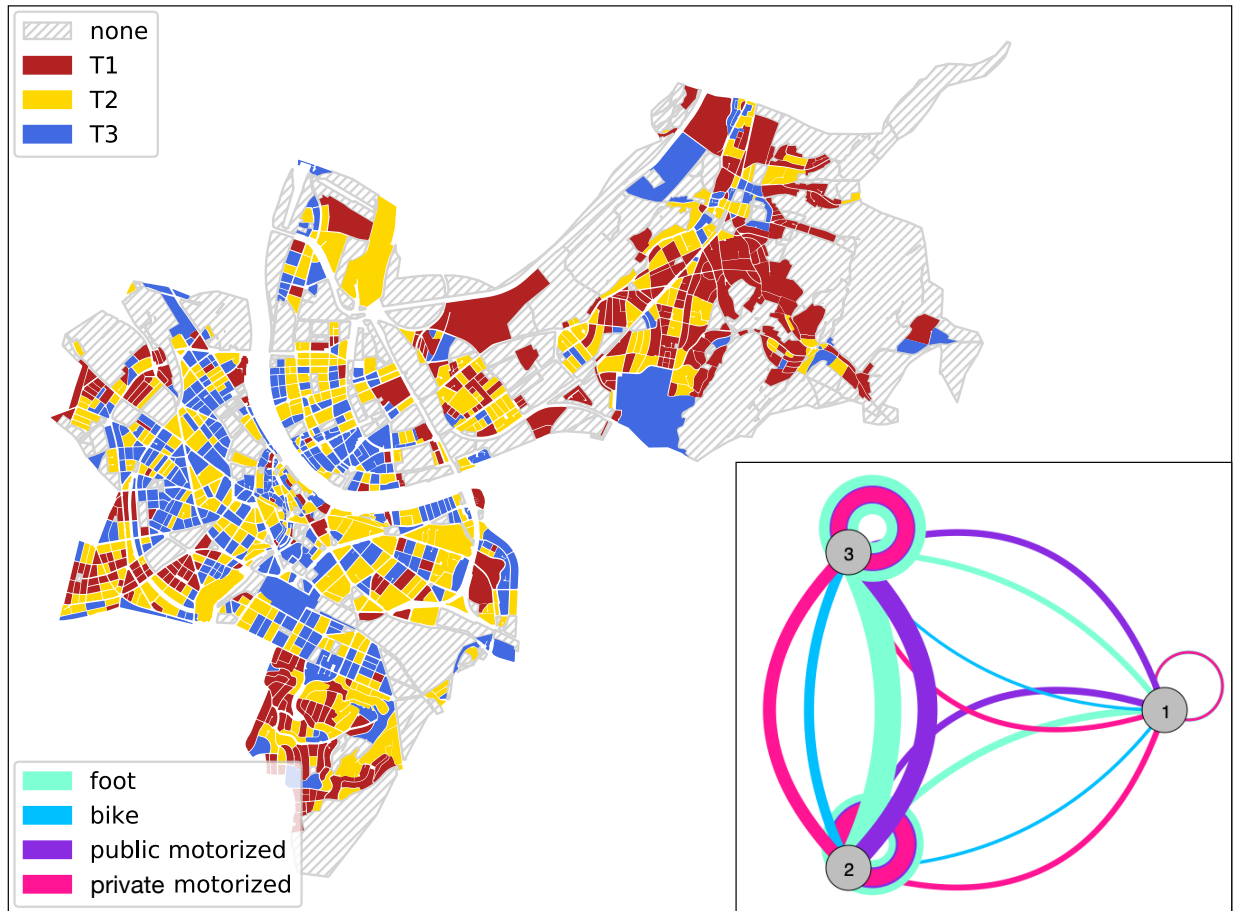

Figure S3: The Canton of Basel-City and its delineation with respect to statistical blocks colored according to the partition into tertiles T1, T2, and T3 of increasing fraction of 1-person households per block as provided by the canton's office for statistics. Inset: resulting mobility-graph, with nodes representing tertiles and edges representing effective connectedness through mobility by means of various modes of transport (thicker/thinner edges indicating weaker/stronger connectedness), as computed from the traffic-model provided by the traffic department of the Canton of Basel-City.

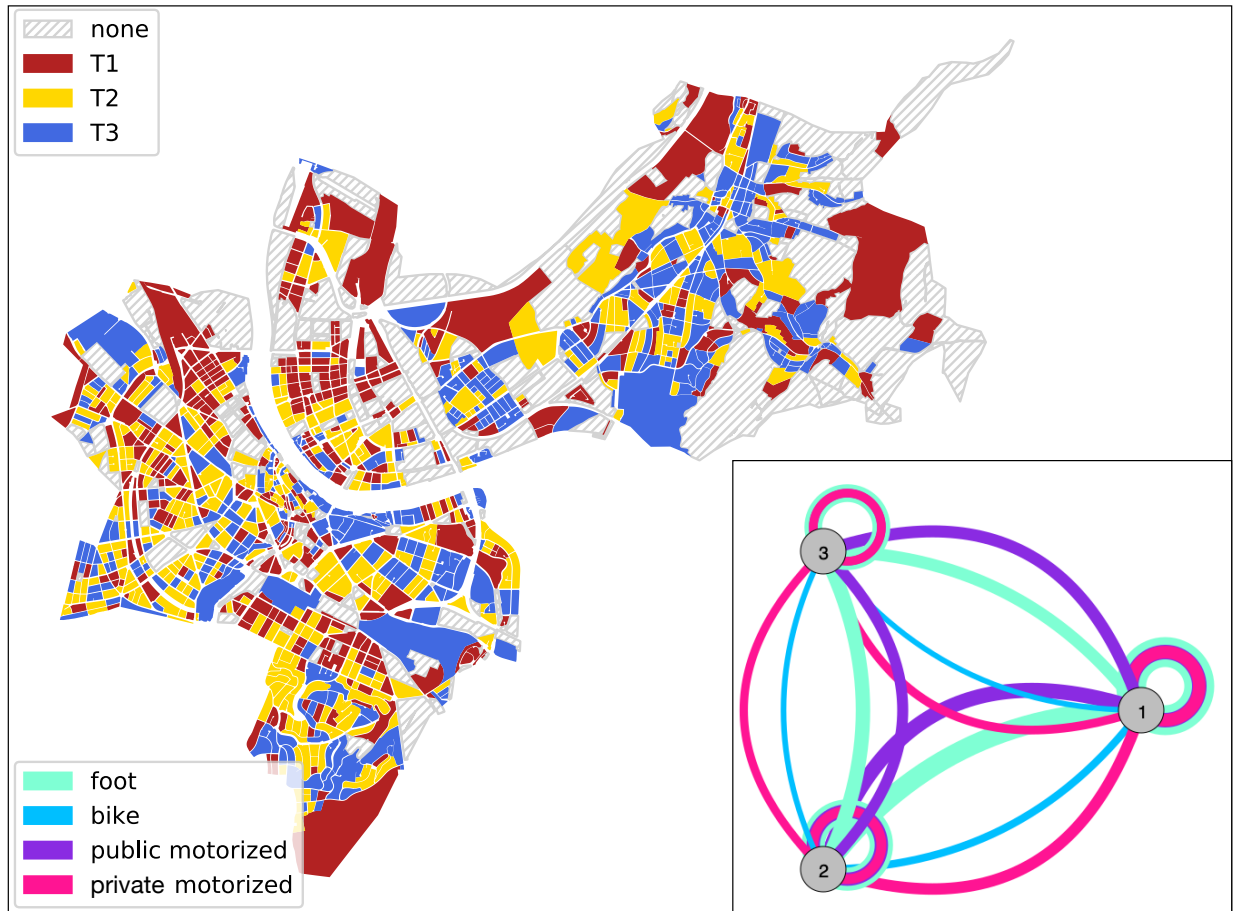

Figure S4: The Canton of Basel-City and its delineation with respect to statistical blocks colored according to the partition into tertiles T1, T2, and T3 of increasing fraction of residents aged older than 64 per block as provided by the canton's office for statistics. Inset: resulting mobility-graph, with nodes representing tertiles and edges representing effective connectedness through mobility by means of various modes of transport (thicker/thinner edges indicating weaker/stronger connectedness), as computed from the traffic-model provided by the traffic department of the Canton of Basel-City.

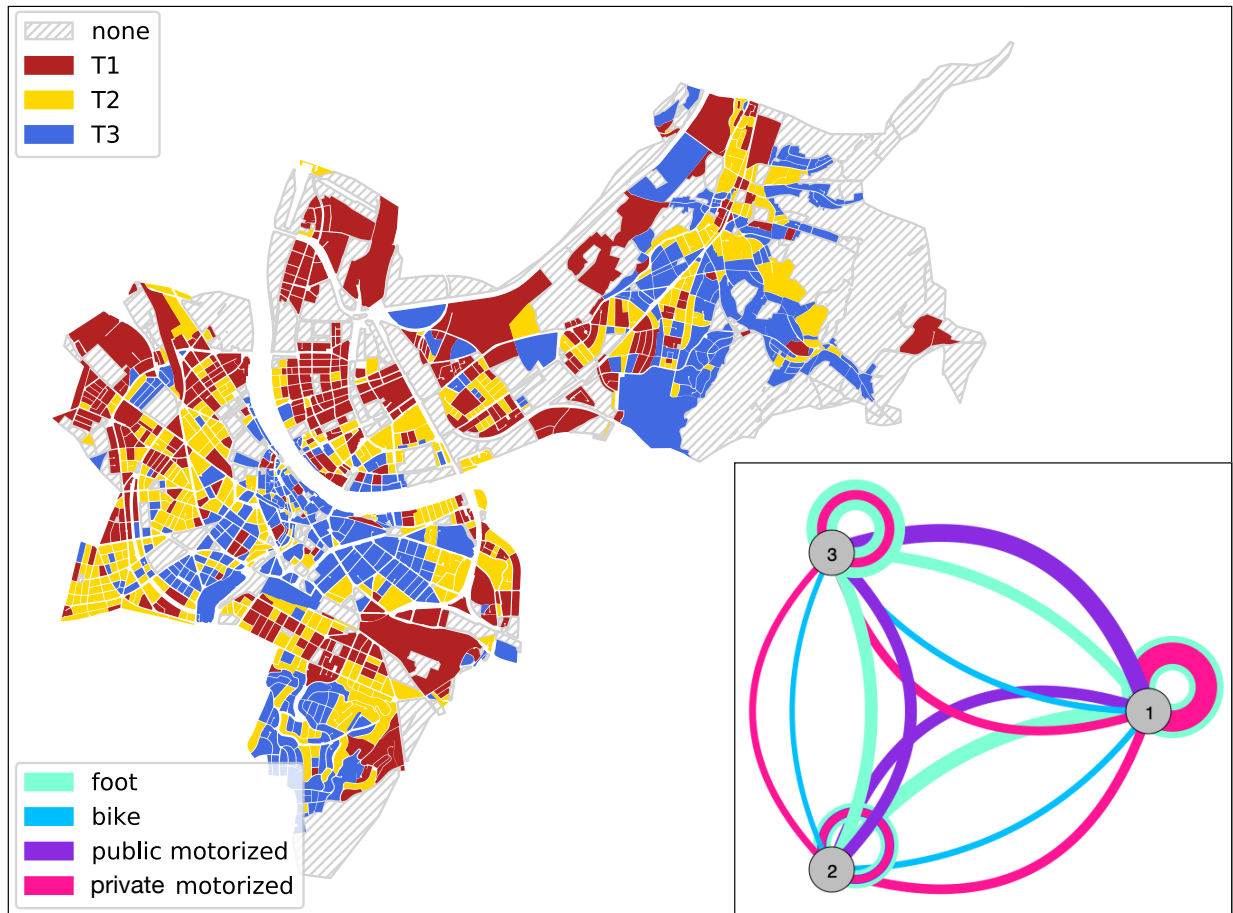

Figure S5: The Canton of Basel-City and its delineation with respect to statistical blocks colored according to the partition into tertiles T1, T2, and T3 of increasing living space per person as provided by the canton's office for statistics. Inset: resulting mobility-graph, with nodes representing tertiles and edges representing effective connectedness through mobility by means of various modes of transport (thicker/thinner edges indicating weaker/stronger connectedness), as computed from the traffic-model provided by the traffic department of the Canton of Basel-City.



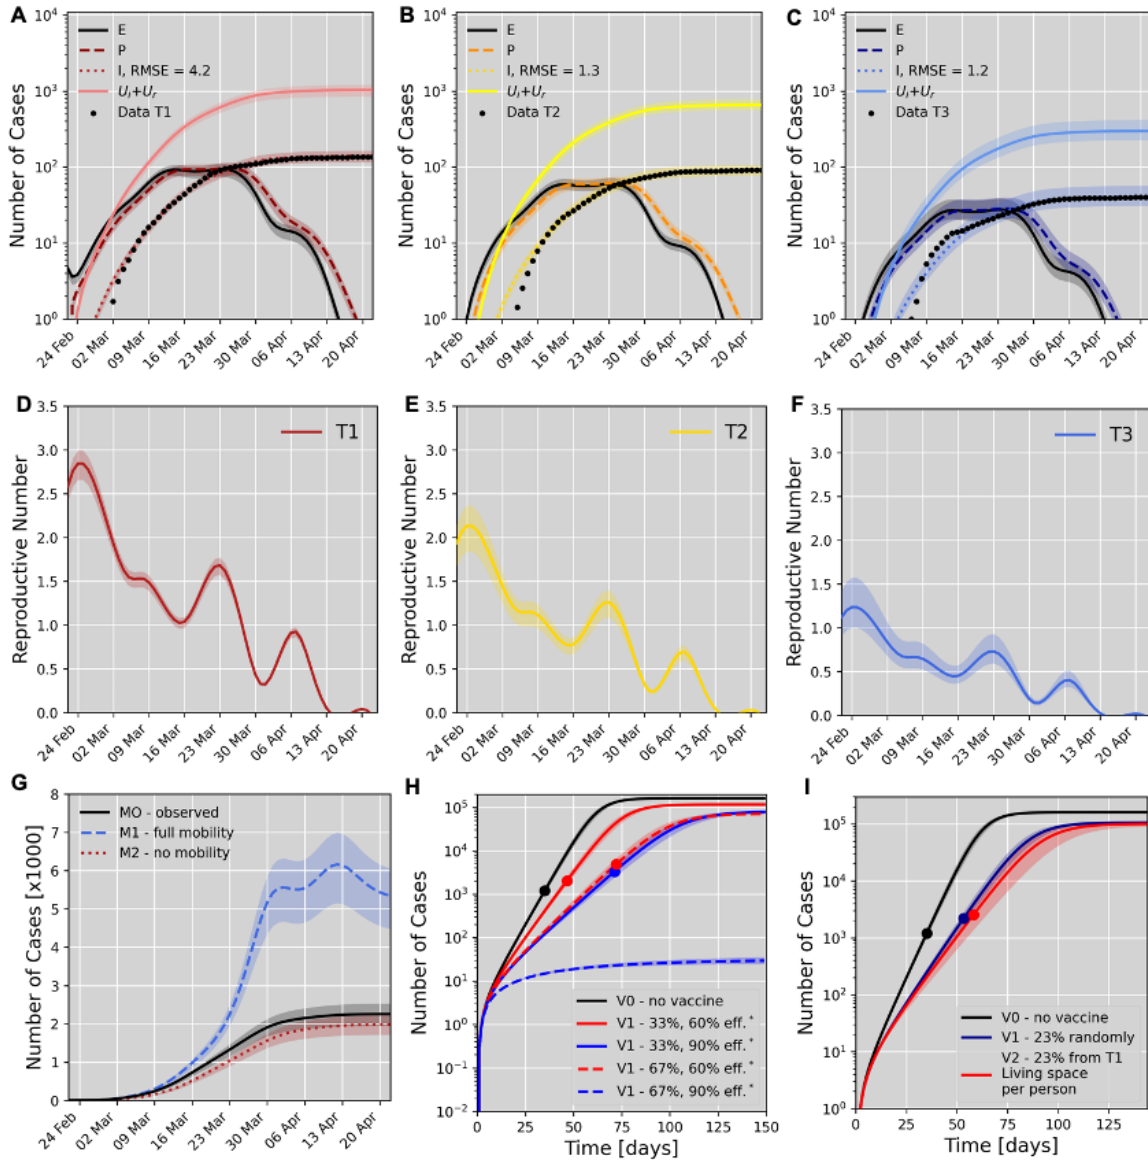

Figure S6: Data fit, reproductive number, and simulation of mobility and vaccination scenarios for a partition according to living space per person. A-C) Model fit to the case number time-series. Data points are shown together with model predictions based on undisturbed data (solid lines), and fifty bootstraps from disturbed data (bands) for the different tertiles T1(A), T2 (B) and T3 (C). D-F) The dynamic variation of the effective reproductive number for each of the tertiles shown in A-C). G) Influence of the mobility pattern on the total number of infected cases (sum of reported and unreported cases) assuming either no change in mobility (M1, 100% mobility), or full shut-down of all inner city mobility (M2, zero mobility). For comparison the observed scenario (M0) is shown. H) Prediction of vaccination effects if a specific percentage of all citizens was randomly selected for vaccination at given efficacy (scenario V1) compared to a simulation in the absence of any vaccination (V0). I) Prediction of vaccination effects if a specific percentage of all citizens was selected for vaccination from tertile T1 according to living space per person (scenario V2) together with the relevant scenarios V0 and V1. In H) and I) Simulations were performed assuming 90% vaccine efficacy for both SARS-CoV-2 transmission and prevention of severe COVID-19. Dots indicate the time of reaching 50% ICU occupancy.

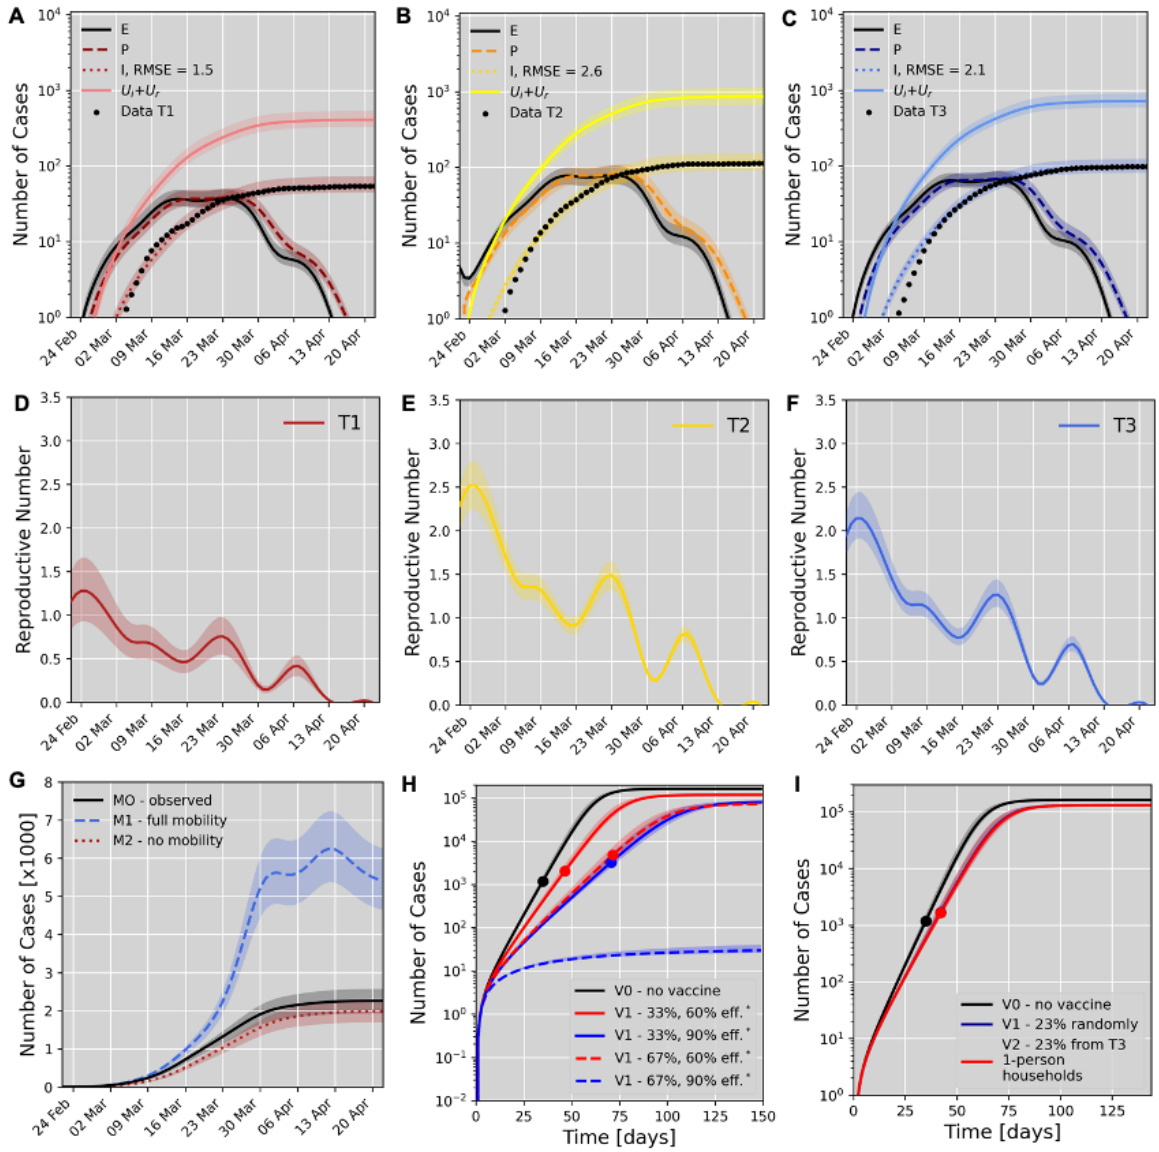

Figure S7: Data fit, reproductive number, and simulation of mobility and vaccination scenarios for a partition according to the share of 1-person households. A-C) Model fit to the case number time-series. Data points are shown together with model predictions based on undisturbed data (solid lines), and fifty bootstraps from disturbed data (bands) for the different tertiles T1 (A), T2 (B) and T3 (C). D-F) The dynamic variation of the effective reproductive number for each of the tertiles shown in A-C). G) Influence of the mobility pattern on the total number of infected cases (sum of reported and unreported cases) assuming either no change in mobility (M1, 100% mobility), or full shut-down of all inner city mobility (M2, zero mobility). For comparison the observed scenario (M0) is shown. H) Prediction of vaccination effects if a specific percentage of all citizens was randomly selected for vaccination at given efficacy (scenario V1) compared to a simulation in the absence of any vaccination (V0). I) Prediction of vaccination effects if a specific percentage of all citizens was selected for vaccination from tertile T2 according to the share of 1-person households (scenario V2) together with the relevant scenarios V0 and V1. In H) and I) Simulations were performed assuming 90% vaccine efficacy for both SARS-CoV-2 transmission and prevention of severe COVID-19. Dots indicate the time of reaching 50% ICU occupancy.

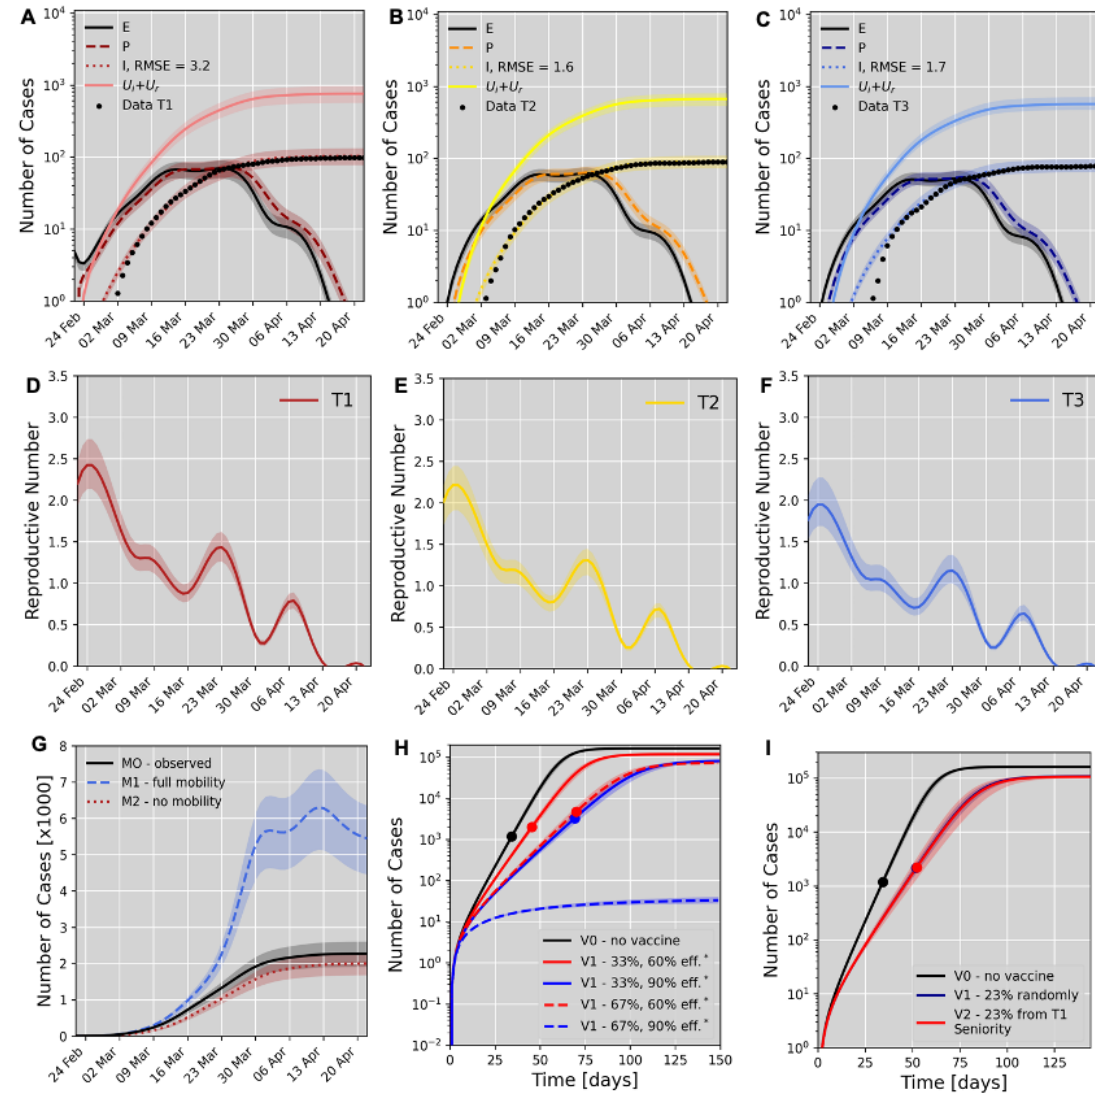

Figure S8: Data fit, reproductive number, and simulation of mobility and vaccination scenarios for a partition according to the share of senior residents. A-C) Model fit to the case number time-series. Data points are shown together with model predictions based on undisturbed data (solid lines), and fifty bootstraps from disturbed data (bands) for the different tertiles T1(A), T2 (B) and T3 (C). D-F) The dynamic variation of the effective reproductive number for each of the tertiles shown in A-C). G) Influence of the mobility pattern on the total number of infected cases (sum of reported and unreported cases) assuming either no change in mobility (M1, 100% mobility), or full shut-down of all inner city mobility (M2, zero mobility). For comparison the observed scenario (M0) is shown. H) Prediction of vaccination effects if a specific percentage of all citizens was randomly selected for vaccination at given efficacy (scenario V1) compared to a simulation in the absence of any vaccination (V0). I) Prediction of vaccination effects if a specific percentage of all citizens was selected for vaccination from tertile T1 according to the share of senior residents (scenario V2) together with the relevant scenarios V0 and V1. In H) and I) Simulations were performed assuming 90% vaccine efficacy for both SARS-CoV-2 transmission and prevention of severe COVID-19. Dots indicate the time of reaching 50% ICU occupancy.

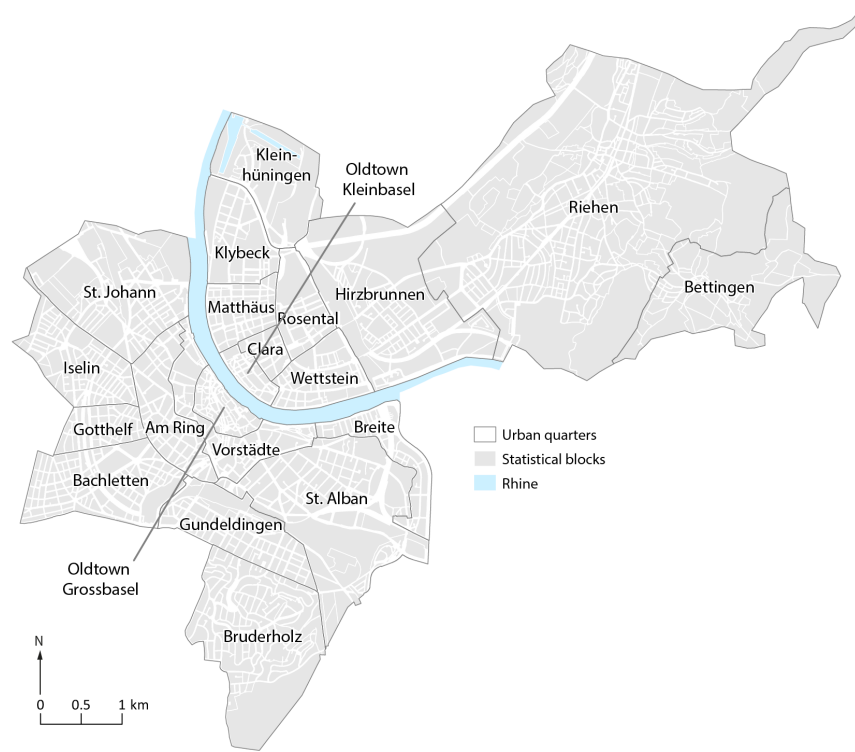

Urban quarters in Basel-City.

Figure S9: Urban quarters in Basel-City.

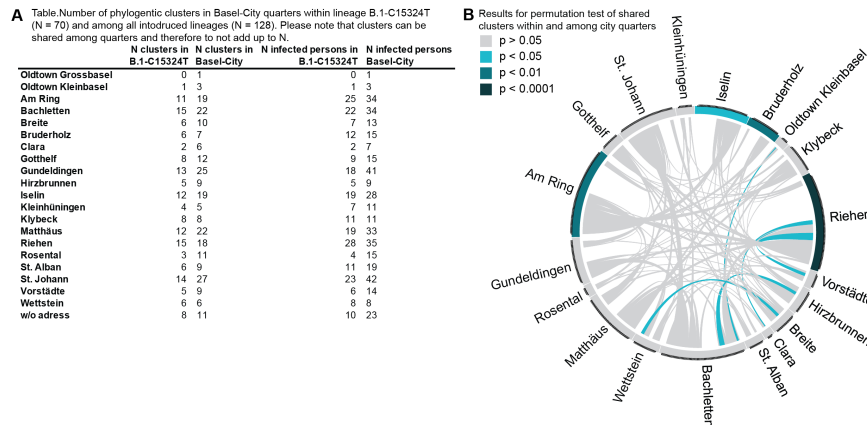

Figure S10: Phylogenetic clusters in quarters of Basel-City. A) Number of clusters within B.1-C15324T and within all viral variants in quarters of Basel-City. B) Visualisation of permutation analysis of shared phylogenetic clusters within and among urban quarters in Basel-City.

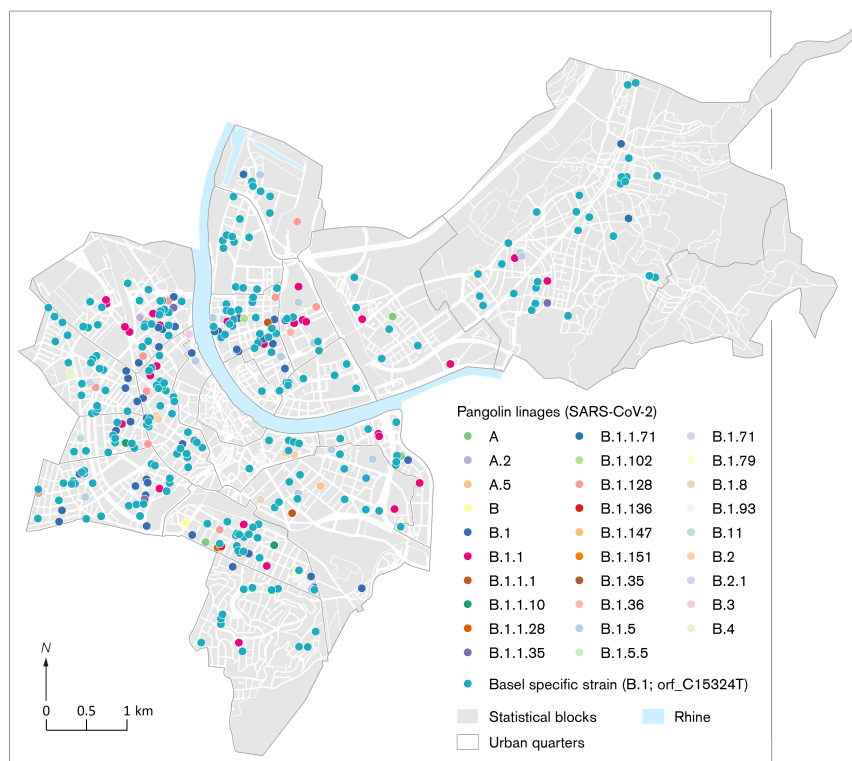

Figure S11: Lineage identity (pangolin) of PCR-confirmed COVID-19 cases from 26th of February until 22nd of April, 2020, in Basel-City with B.1-C15324T as dominant variant highlighted.

| socioeconomic indicator             | achieved significance level |
|-------------------------------------|-----------------------------|
| living space per person             | 1%                          |
| median income                       | 2%                          |
| fraction of 1-person households     | 2%                          |
| fraction of residents aged above 64 | 45%                         |

Table S2: Achieved significance level (ALS) of maximum differences in  $R_{\text{eff}}$  associated with a partition of housing blocks according to various socioeconomic indicators. ALSs have been obtained by comparing these differences in  $R_{\text{eff}}$  with those obtained from 99 bootstrapping random partitions.

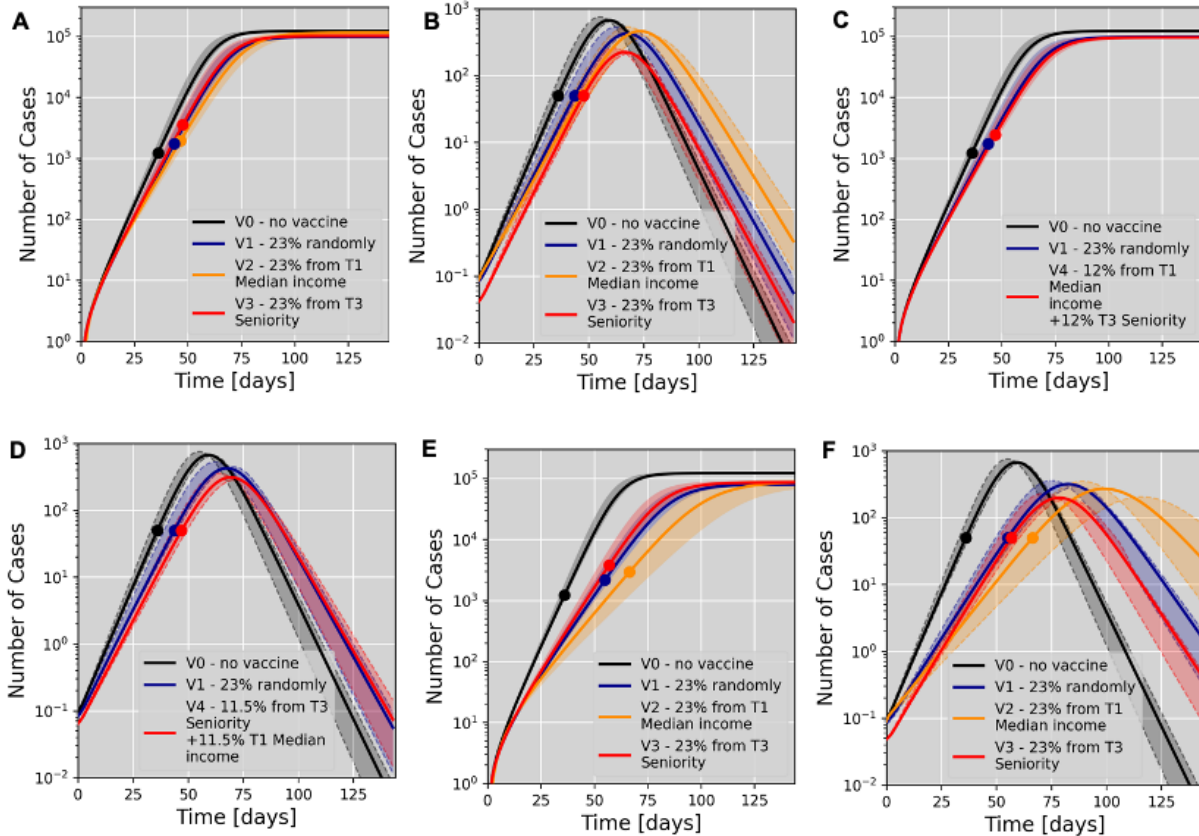

Figure S12: Modelling of vaccine scenarios assuming 60% (A-D) or 90% (E, F) vaccine efficacy to prevent SARS-CoV-2 transmission and 90% (A-D) or 70% (E, F) efficacy against severe COVID-19. We compare with scenarios V0 (no vaccination) and V1 (vaccination at random). Dots indicate the time of reaching a 50% ICU occupancy. A) Simulation of vaccination effects based on a partition according to median income. Scenario V2 models vaccination of 23% of all citizens selected from the tertile with the lowest median income (T1). Scenario V3 models vaccination of 23% of all citizens selected from the tertile with the highest share of senior residents (T3). B) Temporal evolution of ICU occupancy for the scenarios modelled in A). C) Simulation of a mixed vaccination strategy giving equal priority to senior citizens and mobile population groups. D) Temporal evolution of ICU occupancy for the scenarios modelled in C). E) Simulation of the same scenarios as in A) assuming 70% effective vaccination against severe COVID-19, and 90% vaccine efficacy to prevent SARS-CoV-2 transmission. F) Temporal evolution of ICU occupancy for the scenarios modelled in E).

347  
348  
349  
350  
351  
352  
353  
354  
355  
356  
357  
358  
359  
360  
361  
362  
363

1. Leuzinger, K. *et al.* Epidemiology of Severe Acute Respiratory Syndrome Coronavirus 2 Emergence Amidst Community-Acquired Respiratory Viruses. *The Journal of infectious diseases* (2020). URL <http://www.ncbi.nlm.nih.gov/pubmed/33180912>.
2. Kanton Basel-Stadt Datenportal (data.bs.ch 2021). Coronavirus (COVID-19): Fallzahlen Basel-Stadt (2021). URL <https://data.bs.ch/explore/dataset/100073>.
3. Stange, M. *et al.* SARS-CoV-2 outbreak in a tri-national urban area is dominated by a B.1 lineage variant linked to a mass gathering event. *medRxiv; accepted for publication in PLOS Pathogens* 2020.09.01.20186155 (2021). URL <https://doi.org/10.1101/2020.09.01.20186155>.
4. Statistisches Amt Basel-Stadt: Bevölkerungsstatistik. Statistisches Jahrbuch des Kantons Basel-Stadt: Wohnbevölkerung nach Geburtsjahr, Heimat und Geschlecht [t01.1.14] (2021).
5. Elbe, S. & Buckland-Merrett, G. Data, disease and diplomacy: GISAID's innovative contribution to global health. *Global Challenges* **1**, 33–46 (2017). URL <https://pubmed.ncbi.nlm.nih.gov/31565258/>.
6. Shu, Y. & McCauley, J. GISAID: Global initiative on sharing all influenza data – from vision to reality. *Eurosurveillance* **22**, 2–4 (2017). URL <https://www.eurosurveillance.org/content/10.2807/1560-7917.ES.2017.22.13>.

364  
365  
366  
367  
368  
369  
370  
371  
372  
373  
374  
375  
376  
377  
378  
379  
380  
381  
382

7. Hadfield, J. *et al.* NextStrain: Real-time tracking of pathogen evolution. *Bioinformatics* **34**, 4121–4123 (2018). URL <https://pubmed.ncbi.nlm.nih.gov/29790939/>.
8. Huerta-Cepas, J., Serra, F. & Bork, P. ETE 3: Reconstruction, Analysis, and Visualization of Phylogenomic Data. *Molecular Biology and Evolution* **33**, 1635–1638 (2016). URL <https://academic.oup.com/mbe/article/33/6/1635/2579822>.
9. Ragonnet-Cronin, M. *et al.* Automated analysis of phylogenetic clusters. *BMC Bioinformatics* **14**, 317 (2013).
10. Egli, A. *et al.* High-resolution influenza mapping of a city reveals socioeconomic determinants of transmission within and between urban quarters. *bioRxiv* (2020). URL <https://www.biorxiv.org/content/early/2020/04/04/2020.04.03.023135>.  
<https://www.biorxiv.org/content/early/2020/04/04/2020.04.03.023135.full.pdf>.
11. Krzywinski, M. *et al.* Circos: an information aesthetic for comparative genomics. *Genome research* **19**, 1639–45 (2009).  
URL <http://www.ncbi.nlm.nih.gov/pubmed/19541911>  
<http://www.pubmedcentral.nih.gov/articlerender.fcgi?artid=PMC2752132>.
12. Bau- und Verkehrsdepartement Basel-Stadt Mobilität / Mobilitätsstrategie. Gesamtverkehrsmodell der Region Basel, Basismodell: “Ist-Zustand 2016” (2020).
13. Kalman, R. E. *et al.* Contributions to the theory of optimal control. *Bol. soc. mat. mexicana* **5**, 102–119 (1960).



- 383 14. Welch, G., Bishop, G. *et al.* An introduction to the kalman filter (1995).
- 384 15. AstraZeneca. AZD1222 vaccine met primary efficacy endpoint in preventing COVID-19  
385 (2020).
- 386 16. Mahase, E. Covid-19: Moderna vaccine is nearly 95% effective, trial involving high risk and  
387 elderly people shows. *BMJ: British Medical Journal (Online)* **371** (2020).
- 388 17. Canton Basel-City, Department of Presidential Affairs, External Affairs  
389 and Marketing 2021: Regional, national and trinational cooperation.  
390 URL: [https://www.marketing.bs.ch/en/institutional-cooperation/tri-national-](https://www.marketing.bs.ch/en/institutional-cooperation/tri-national-cooperation.html)  
391 [cooperation.html](https://www.marketing.bs.ch/en/institutional-cooperation/tri-national-cooperation.html).
- 392 18. TEB-Trinationaler Eurodistrict Basel 2021:<https://www.eurodistrictbasel.eu/de/home.html>.
- 393 19. European Commission Eurostat: Metropolitan regions. URL :  
394 <https://ec.europa.eu/eurostat/web/metropolitan-regions/background>.
- 395 20. Dijkstra, L., Poelman, H. & Veneri, P. The EU-OECD definition of a functional urban area.  
396 OECD Regional Development Working Papers 2019/11, OECD Publishing (2019). URL  
397 <https://ideas.repec.org/p/oec/govaab/2019-11-en.html>.
- 398 21. EURES-T Oberrhein 2021: <https://www.eures-t-oberrhein.eu/>.
- 399 22. Canton Basel-City Statistics Office: Cross-border commuters 2020, based  
400 on Federal Statistics Office Cross-border statistics Indicator I.03.5.2152.  
401 <https://www.statistik.bs.ch/haeufig-gefragt/arbeiten/grenzgaenger.html>.

- 402 23. Perkmann, M. Cross-Border Regions in Europe. *Euro-*  
403 *pean Urban and Regional Studies* **10**, 153–171 (2003). URL  
404 <http://journals.sagepub.com/doi/10.1177/0969776403010002004>.
- 405 24. EURES-T Oberrhein 2021: <https://www.aebr.eu/>.
- 406 25. Randstadt Region 2019 Randstad Monitor 2019. [https://www.nl-prov.eu/wp-](https://www.nl-prov.eu/wp-content/uploads/2019/05/randstad-monitor-gecomprimeerd-2-gecomprimeerd-compressed.pdf)  
407 [content/uploads/2019/05/randstad-monitor-gecomprimeerd-2-gecomprimeerd-](https://www.nl-prov.eu/wp-content/uploads/2019/05/randstad-monitor-gecomprimeerd-2-gecomprimeerd-compressed.pdf)  
408 [compressed.pdf](https://www.nl-prov.eu/wp-content/uploads/2019/05/randstad-monitor-gecomprimeerd-2-gecomprimeerd-compressed.pdf).
- 409 26. Randstadt Region 2017 Randstad Monitor 2017. [https://www.nl-prov.eu/wp-](https://www.nl-prov.eu/wp-content/uploads/2017/11/regio-randstad-monitor-2017.pdf)  
410 [content/uploads/2017/11/regio-randstad-monitor-2017.pdf](https://www.nl-prov.eu/wp-content/uploads/2017/11/regio-randstad-monitor-2017.pdf).
- 411 27. Trinationale Metropolregion Oberrhein 2021. Wirtschaft. <https://www.rmtmo.eu/de/wirtschaft.html>  
412 .
- 413 28. Trinationale Metropolregion Oberrhein 2021. Metropolregion.  
414 <https://www.rmtmo.eu/de/metropolregion.html>.
- 415 29. Jay, J. *et al.* Neighbourhood income and physical distancing during the COVID-  
416 19 pandemic in the United States. *Nature human behaviour* (2020). URL  
417 <http://www.ncbi.nlm.nih.gov/pubmed/33144713>.
- 418 30. De Ridder, D. *et al.* Socioeconomically Disadvantaged Neighborhoods Face In-  
419 creased Persistence of SARS-CoV-2 Clusters. *Frontiers in Public Health* **8** (2021). URL  
420 <https://www.frontiersin.org/articles/10.3389/fpubh.2020.626090/full>.

421 31. Bluhm, A. *et al.* SARS-CoV-2 transmission routes from genetic  
422 data: A Danish case study. *PLOS ONE* **15**, e0241405 (2020). URL  
423 <https://dx.plos.org/10.1371/journal.pone.0241405>.
